# Supplementary material
Source: Springer Nature journal article supplement (https://www.springermedizin.de/resource/supplementary/12885_2013_4391_MOESM1_ESM.pdf/9466172)

**A**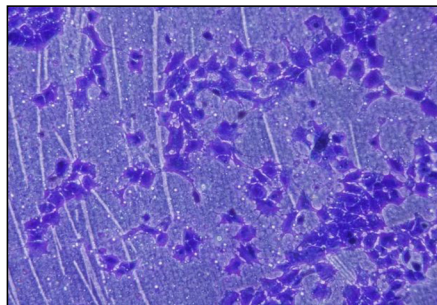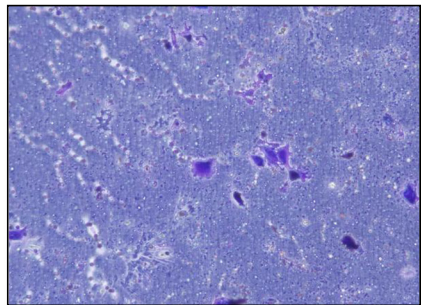**CT****ZA****B**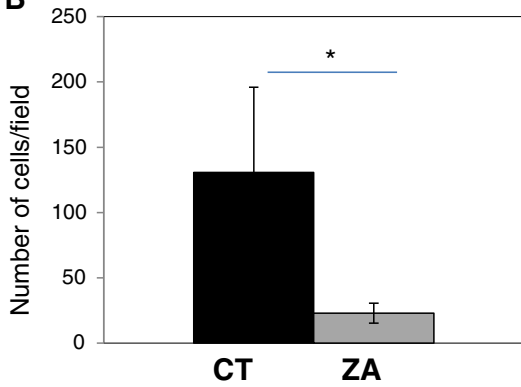

Supplement: MOESM1 [file 9466172]
